# Supplementary material for: A prototype for catalytic removal of formaldehyde and CO in a compact air cleaner powered by portable electricity
Source: Royal Society of Chemistry journal article supplement (doi:10.1039/d0ma00765j), 2020-01-01
Supplement: d0ma00765j1.pdf [file d0ma00765j1.pdf]

## Electronic Supplementary Information

### **A prototype for catalytic removals of formaldehyde and CO in a compact air cleaner powered by portable electricity**

Yexin Zhang,<sup>\*ab</sup> Xueyi Mei,<sup>ab</sup> Jiao Wang,<sup>a</sup> Chunlin Chen,<sup>ab</sup> Xingbao Zhu,<sup>ab</sup> Gongjun Zhang,<sup>a</sup> Jian

Zhang<sup>\*ab</sup>

<sup>a</sup> Key Laboratory of Bio-based Polymeric Materials Technology and Application of Zhejiang Province, Ningbo Institute of Materials Technology & Engineering, Chinese Academy of Sciences, 1219 Zhongguan West Road, Ningbo 315201, People's Republic of China.

<sup>b</sup> University of the Chinese Academy of Sciences, 19A Yuquan Road, Beijing 100049, People's Republic of China

Corresponding to [jzhang@nimte.ac.cn](mailto:jzhang@nimte.ac.cn) (Jian Zhang) and [zhangyexin@nimte.ac.cn](mailto:zhangyexin@nimte.ac.cn) (Yexin Zhang)

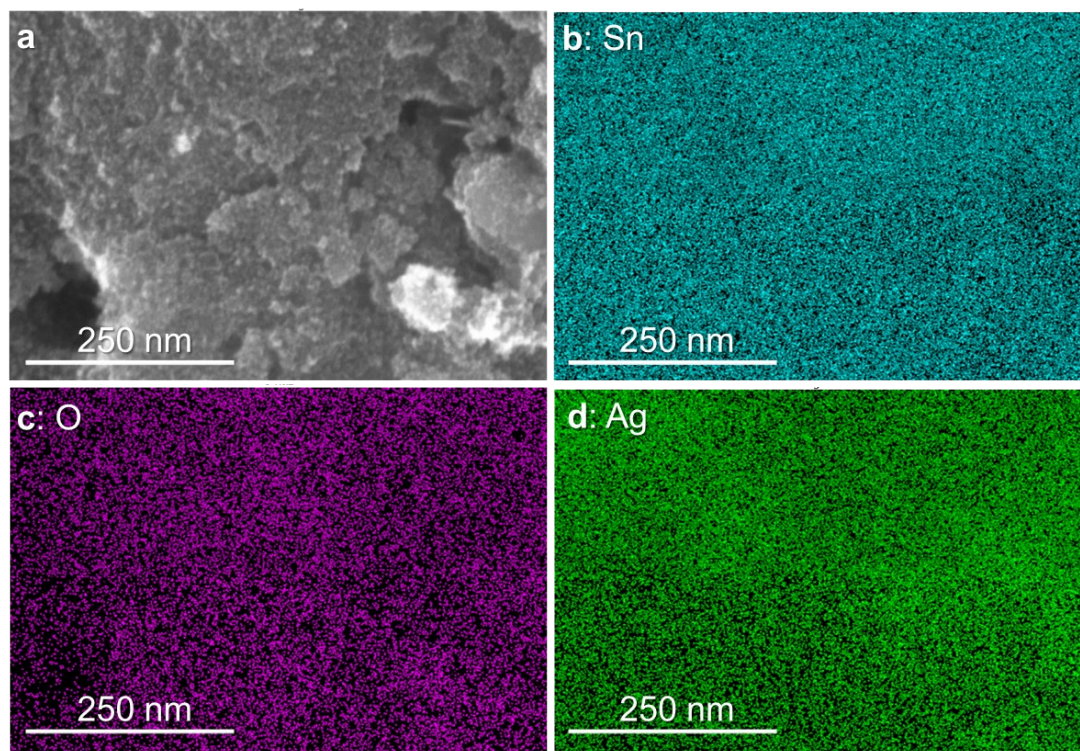

**Fig. S1** Energy dispersive spectroscopy (EDS) on the scanning electron microscope (SEM) for the Ag-SnO<sub>2</sub> catalyst. (a) SEM image, (b-d) EDS maps showing Sn (b), O (c) and Ag (d)

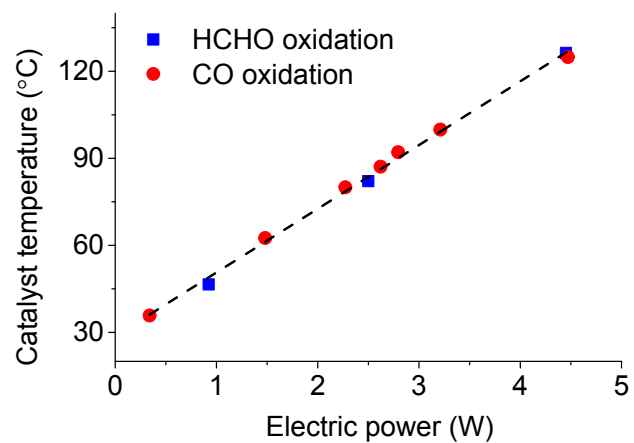

**Fig. S2** Plot of the dependence of catalyst temperature on the electric power in the HCHO and CO oxidations powered by electricity.

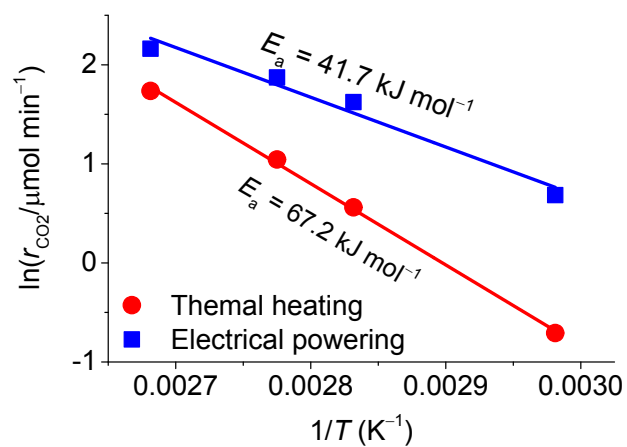

**Fig. S3** Arrhenius plots labeled with the calculated apparent activated energies ( $E_a$ ) for CO oxidations over the Ag-SnO<sub>2</sub> catalyst in the electrical powering and thermal heating ways.

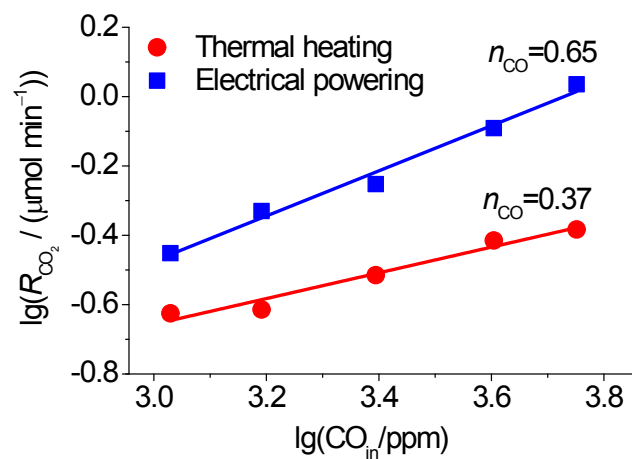

**Fig. S4** Comparison in the logarithm plots for CO reaction orders over the Ag-SnO<sub>2</sub> catalyst in the electrical powering and thermal heating ways. The reaction in the electrical powering way was performed with the electric current of 0.3 A induced a catalyst temperature of 67 °C while the reaction in the thermal heating way was conducted at the same temperature.

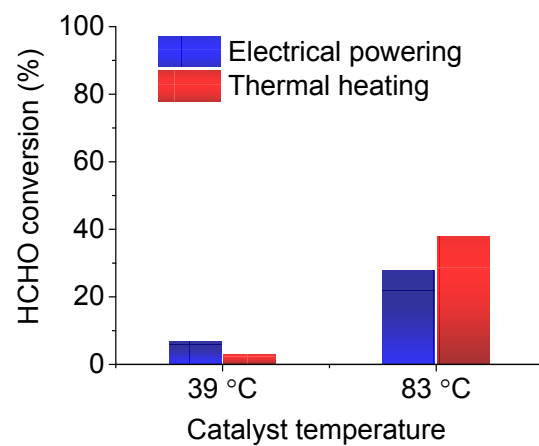

**Fig. S5** Performance comparison in HCHO conversion between the electrical powering and the thermal heating ways over the Ag-SnO<sub>2</sub> catalyst with Ag content of 70 wt.%.

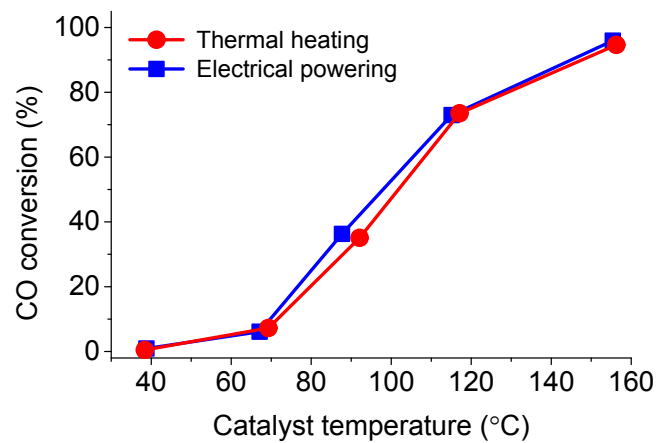

**Fig. S6** Performance comparison in CO conversion between the electrical powering and the thermal heating ways over the Ag-SnO<sub>2</sub> catalyst with the Ag content of 70 wt.%.

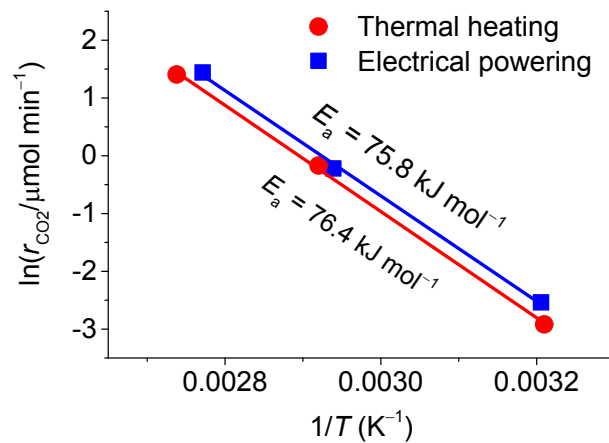

**Fig. S7** Arrhenius plots labeled with the calculated apparent activated energies ( $E_a$ ) for CO oxidations in the electrical powering and thermal heating ways over the Ag-SnO<sub>2</sub> catalyst with 70 wt.% Ag content.
